# Supplementary material for: Glucose-6-Phosphate Dehydrogenases: The Hidden Players of Plant Physiology
Source: MDPI journal article supplement (doi:10.3390/ijms232416128), 2022-12-17
Supplement: s1 [file s1]

## Supplementary data

**Table S1. List of relative gene information encoding different G6PDH isforms in 8 higher plants.**

| Gene symbol  | Organism                           | Protein accession | Gene stable ID       |
|--------------|------------------------------------|-------------------|----------------------|
| G6PD1        | <i>Arabidopsis thaliana</i>        | NP_198428.1       | AT5G35790            |
| G6PD2        | <i>Arabidopsis thaliana</i>        | NP_196815.1       | AT5G13110            |
| G6PD3        | <i>Arabidopsis thaliana</i>        | NP_173838.1       | AT1G24280            |
| G6PD4        | <i>Arabidopsis thaliana</i>        | NP_563844.1       | AT1G09420            |
| G6PD5        | <i>Arabidopsis thaliana</i>        | NP_189366.1       | AT3G27300            |
| G6PD6        | <i>Arabidopsis thaliana</i>        | NP_198892.1       | AT5G40760            |
| LOC4329889   | <i>Oryza sativa Japonica Group</i> | XP_015627059.1    | Os02g0600400         |
| LOC4336209   | <i>Oryza sativa Japonica Group</i> | XP_015635836.1    | Os04g0485300         |
| LOC4342988   | <i>Oryza sativa Japonica Group</i> | XP_015647088.1    | Os07g0406300         |
| LOC4333103   | <i>Oryza sativa Japonica Group</i> | XP_015628664.1    | Os03g0412800         |
| LOC4332659   | <i>Oryza sativa Japonica Group</i> | XP_025879520.1    | Os03g0318500         |
| LOC112187819 | <i>Rosa chinensis</i>              | XP_024182532.1    | RchiOBHm_Ch2g0156161 |
| LOC112200384 | <i>Rosa chinensis</i>              | XP_024197181.1    | RchiOBHm_Ch4g0429721 |
| LOC112187722 | <i>Rosa chinensis</i>              | XP_024182385.1    | RchiOBHm_Ch2g0155901 |
| LOC112193013 | <i>Rosa chinensis</i>              | XP_024188781.1    | RchiOBHm_Ch3g0457961 |
| LOC112185338 | <i>Rosa chinensis</i>              | XP_024179344.1    | RchiOBHm_Ch2g0174311 |
| LOC112175829 | <i>Rosa chinensis</i>              | XP_024169347.1    | Nd                   |
| LOC101258470 | <i>Solanum lycopersicum</i>        | XP_004243567.1    | Solyc07g045540       |
| LOC101253589 | <i>Solanum lycopersicum</i>        | XP_004239245.1    | Solyc05g015950       |
| LOC101258494 | <i>Solanum lycopersicum</i>        | XP_004230338.1    | Solyc01g100960       |
| LOC101249507 | <i>Solanum lycopersicum</i>        | XP_004231802.1    | Solyc02g093830       |
| LOC102594145 | <i>Solanum tuberosum</i>           | NP_001275038.1    | X83923               |
| LOC102597484 | <i>Solanum tuberosum</i>           | NP_001275072.1    | CAB52708             |
| LOC102592547 | <i>Solanum tuberosum</i>           | XP_006344803.1    | Nd                   |
| LOC102595038 | <i>Solanum tuberosum</i>           | NP_001275397.1    | X74421               |
| LOC100284317 | <i>Zea mays</i>                    | NP_001150684.1    | GRMZM2G130230        |
| LOC100279290 | <i>Zea mays</i>                    | NP_001352992.1    | GRMZM2G177077        |
| LOC100383421 | <i>Zea mays</i>                    | NP_001169544.1    | GRMZM2G031107        |
| LOC100304292 | <i>Zea mays</i>                    | NP_001348206.1    | GRMZM2G426964        |
| LOC100383765 | <i>Zea mays</i>                    | NP_001169871.1    | GRMZM2G179521        |
| LOC18790433  | <i>Prunus persica</i>              | XP_007226936.1    | PRUPE_1G222100       |
| LOC18781823  | <i>Prunus persica</i>              | XP_020415160.1    | PRUPE_3G198600       |
| LOC18772820  | <i>Prunus persica</i>              | XP_007208319.1    | PRUPE_6G307600       |
| LOC18783720  | <i>Prunus persica</i>              | XP_007215121.1    | PRUPE_3G300200       |
| LOC100264918 | <i>Vitis vinifera</i>              | XP_002268887.1    | Nd                   |
| LOC100267681 | <i>Vitis vinifera</i>              | XP_002266930.1    | VIT_00000913001      |
| LOC100254628 | <i>Vitis vinifera</i>              | XP_010659726.1    | VIT_00031295001      |
| LOC100254253 | <i>Vitis vinifera</i>              | XP_002266527.1    | VIT_00001847001      |
| LOC100266583 | <i>Vitis vinifera</i>              | XP_010657480.1    | VIT_00030086001      |

All information is based on NCBI website (<https://www.ncbi.nlm.nih.gov>), Nd means

lack of relevant information.
